# Supplementary material
Source: publisher site journal article supplement (https://www.dovepress.com/article/304444)
Supplement: Supplementary file 1 [file get_supplementary_file.php]

#### 4. Exercise:

Choose one that best describes what your doctor advised:

- Only exercise on an empty stomach (4 hours without eating)
- Limit exercise after eating wheat or gluten (within 4 hours)
- Exercise at any time
- Avoid all exercise because of the Omega-5-gliadin allergy
- Avoid all exercise for other reasons

Choose one that best describes what you do now:

- I only exercise on an empty stomach (4 hours without eating)
- I limit exercise after eating wheat or gluten (within 4 hours)
- I exercise at any time
- I do not do any exercise because of the Omega-5-gliadin allergy
- I do not do any exercise for other reasons

#### 5. Reactions since diagnosis

What do you think were relevant factors in any reactions that have occurred since you have known about the diagnosis? You may choose more than one:

- I decided to eat wheat / gluten
- I accidentally ate wheat / gluten
- I had unexpected exercise or exertion
- Travel / restaurant / take-away / unfamiliar situation
- I have another medical reason for these reactions
- I don't know what happened
- I have not had any reactions since the diagnosis

#### 6. Action plan and Severity:

Have you ever had Anaphylaxis? Y/N

(This is a severe generalised allergic reaction with dangerous features like collapse, fainting, or serious breathlessness. It may often be treated with Adrenaline injection)

Y/N Have you been prescribed an Epipen or Anapen?

Y/N I have a written action plan for my allergy

Y/N I am a member of the ambulance service

Please make note of any other comments, responses or details regarding this questionnaire.
